# Supplementary material for: A Bibliometric Analysis of Publications on COVID-19 and Older Adults
Source: PubMed Central journal article supplement — Ann Geriatr Med Res. 2021 Jul 7;25(3):197–203. doi: 10.4235/agmr.21.0060 (PMC8497949; doi:10.4235/agmr.21.0060), 2021-07-07
Supplement: agmr-21-0060-suppl.pdf [file agmr-21-0060-suppl.pdf]

## SUPPLEMENTARY MATERIALS

**Table S1.** Top 50 cited publications on COVID-19 and older adults

| Rank | Title                                                                                                                              | Journal                                           | Article type       | Country of the corresponding author | Publication date | Citations |
|------|------------------------------------------------------------------------------------------------------------------------------------|---------------------------------------------------|--------------------|-------------------------------------|------------------|-----------|
| 1    | Clinical features of COVID-19 in elderly patients: a comparison with young and middle-aged patients                                | <i>Journal of Infection</i>                       | Review             | China                               | June 2020        | 312       |
| 2    | The role of vitamin D in the prevention of coronavirus disease 2019 infection and mortality                                        | <i>Aging Clinical and Experimental Research</i>   | Article            | England                             | July 2020        | 192       |
| 3    | Mental health services for older adults in China during the COVID-19 outbreak                                                      | <i>Lancet Psychiatry</i>                          | Letter             | China                               | April 2020       | 173       |
| 4    | Age-dependent effects in the transmission and control of COVID-19 epidemics                                                        | <i>Nature Medicine</i>                            | Article            | England                             | August 2020      | 140       |
| 5    | COVID-19 and older adults: what we know                                                                                            | <i>Journal of the American Geriatrics Society</i> | Review             | USA                                 | May 2020         | 114       |
| 6    | SARS-CoV-2 and COVID-19 in older adults: what we may expect regarding pathogenesis, immune responses, and outcomes                 | <i>Geroscience</i>                                | Review             | USA                                 | April 2020       | 107       |
| 7    | Coronavirus disease 2019 in geriatrics and long-term care: the ABCDs of COVID-19                                                   | <i>Journal of the American Geriatrics Society</i> | Article            | USA                                 | May 2020         | 80        |
| 8    | Anticipating and mitigating the impact of the COVID-19 pandemic on Alzheimer's disease and related dementias                       | <i>American Journal of Geriatric Psychiatry</i>   | Article            | Canada                              | July 2020        | 74        |
| 9    | Analysis of Epidemiological and clinical features in older patients with coronavirus disease 2019 (COVID-19) outside Wuhan         | <i>Clinical Infectious Diseases</i>               | Article            | China                               | August 2020      | 69        |
| 10   | COVID-19 and chronological aging: senolytics and other anti-aging drugs for the treatment or prevention of corona virus infection? | <i>Aging-US</i>                                   | Article            | England                             | April 2020       | 62        |
| 11   | The coronavirus and the risks to the elderly in long-term                                                                          | <i>Journal of Aging &amp; Social Policy</i>       | Editorial material | Canada                              | July 2020        | 55        |

|    | care                                                                                                                                 |                                                   |                    |           |               |    |
|----|--------------------------------------------------------------------------------------------------------------------------------------|---------------------------------------------------|--------------------|-----------|---------------|----|
| 12 | Why does COVID-19 disproportionately affect older people?                                                                            | <i>Aging-US</i>                                   | Review             | USA       | May 2020      | 53 |
| 13 | Characteristics of US nursing homes with COVID-19 cases                                                                              | <i>Journal of the American Geriatrics Society</i> | Article            | USA       | Aug 2020      | 50 |
| 14 | Loneliness and social isolation in older adults during the Covid-19 pandemic: implications for gerontological social work            | <i>Journal of Nutrition Health &amp; Aging</i>    | Editorial material | USA       | May 2020      | 48 |
| 15 | COVID-19 presents high risk to older persons                                                                                         | <i>Journal of the American Geriatrics Society</i> | Editorial material | USA       | April 2020    | 48 |
| 16 | Clinical presentation of COVID19 in dementia patients                                                                                | <i>Journal of Nutrition Health &amp; Aging</i>    | Article            | Italy     | June 2020     | 44 |
| 17 | Risk factors for mortality in 244 older adults with COVID-19 in Wuhan, China: a retrospective study                                  | <i>Journal of the American Geriatrics Society</i> | Article            | China     | June 2020     | 42 |
| 18 | COVID-19 and older adult                                                                                                             | <i>Journal of Nutrition Health &amp; Aging</i>    | Editorial material | USA       | April 2020    | 39 |
| 19 | COVID-19 in older people: a rapid clinical review                                                                                    | <i>Age and Ageing</i>                             | Review             | England   | July 2020     | 38 |
| 20 | Clinical characteristics of older patients infected with descriptive study COVID-19: a descriptive study                             | <i>Archives of Gerontology and Geriatrics</i>     | Article            | China     | July 2020     | 38 |
| 21 | COVID-19 and the elderly: insights into pathogenesis and clinical decision-making                                                    | <i>Aging Clinical and Experimental Research</i>   | Review             | Italy     | August 2020   | 37 |
| 22 | Safety and immunogenicity of SARS-CoV-2 mRNA-1273 vaccine in older adults                                                            | <i>New England Journal of Medicine</i>            | Article            | USA       | December 2020 | 37 |
| 23 | Risk factors for predicting mortality in elderly patients with COVID-19: a review of clinical data in China                          | <i>Mechanisms of Ageing and Development</i>       | Review             | Australia | June 2020     | 37 |
| 24 | Prevalence of malnutrition and analysis of related factors in elderly patients with COVID-19 in Wuhan, China                         | <i>European Journal of Clinical Nutrition</i>     | Article            | China     | June 2020     | 37 |
| 25 | Recovering from the COVID-19 Pandemic: a focus on older adults                                                                       | <i>Journal of Aging &amp; Social Policy</i>       | Article            | USA       | July 2020     | 34 |
| 26 | COVID-19-associated cardiovascular morbidity in older adults: a position paper from the Italian Society of Cardiovascular Researches | <i>Geroscience</i>                                | Review             | Italy     | August 2020   | 34 |
| 27 | Risk factors for mortality in patients with coronavirus                                                                              | <i>Aging Male</i>                                 | Review             | Iran      | June 2020     | 31 |

|    |                                                                                                                                               |                                                                                   |                    |         |                |    |
|----|-----------------------------------------------------------------------------------------------------------------------------------------------|-----------------------------------------------------------------------------------|--------------------|---------|----------------|----|
|    | disease 2019 (COVID-19) infection: a systematic review and meta-analysis of observational studies                                             |                                                                                   |                    |         |                |    |
| 28 | The potential long-term impact of the COVID-19 outbreak on patients with non-communicable diseases in Europe: consequences for healthy ageing | <i>Aging Clinical and Experimental Research</i>                                   | Review             | France  | July 2020      | 31 |
| 29 | Action at a distance: geriatric research during a pandemic                                                                                    | <i>Journal of the American Geriatrics Society</i>                                 | Article            | USA     | May 2020       | 31 |
| 30 | A geroscience perspective on COVID-19 mortality                                                                                               | <i>Journals of Gerontology Series A: Biological Sciences and Medical Sciences</i> | Article            | USA     | September 2020 | 28 |
| 31 | COVID-19 spiraling of frailty in older Italian patients                                                                                       | <i>Journal of Nutrition Health &amp; Aging</i>                                    | Editorial material | Italy   | May 2020       | 27 |
| 32 | Atypical presentation of COVID-19 in a frail older person                                                                                     | <i>Age and Ageing</i>                                                             | Editorial material | England | July 2020      | 27 |
| 33 | COVID-19, mental health and aging: a need for new knowledge to bridge science and service                                                     | <i>American Journal of Geriatric Psychiatry</i>                                   | Editorial material | USA     | July 2020      | 26 |
| 34 | The possible pathophysiology mechanism of cytokine storm in elderly adults with COVID-19 infection: the contribution of inflame-aging         | <i>Inflammation Research</i>                                                      | Review             | Iran    | September 2020 | 26 |
| 35 | Analyze the psychological impact of COVID-19 among the elderly population in China and make corresponding suggestions                         | <i>Psychiatry Research</i>                                                        | Letter             | China   | July 2020      | 26 |
| 36 | American Geriatrics Society Policy Brief: COVID-19 and nursing homes                                                                          | <i>Journal of the American Geriatrics Society</i>                                 | Article            | USA     | May 2020       | 26 |
| 37 | Novel coronavirus (COVID-19) epidemic: what are the risks for older patients?                                                                 | <i>Journal of the American Geriatrics Society</i>                                 | Letter             | France  | May 2020       | 25 |
| 38 | Delirium: a missing piece in the COVID-19 pandemic puzzle                                                                                     | <i>Age and Ageing</i>                                                             | Editorial material | Ireland | July 2020      | 25 |
| 39 | Ageism and COVID-19: what does our society's response say about us?                                                                           | <i>Age and Ageing</i>                                                             | Editorial material | Canada  | September 2020 | 24 |
| 40 | Clinical characteristics and prognostic factors in COVID-19 patients aged $\geq$ 80 years                                                     | <i>Geriatrics &amp; Gerontology International</i>                                 | Article            | Italy   | July 2020      | 23 |

|    |                                                                                                                      |                                                   |                    |              |                |    |
|----|----------------------------------------------------------------------------------------------------------------------|---------------------------------------------------|--------------------|--------------|----------------|----|
| 41 | COVID-19: the implications for suicide in older adults                                                               | <i>International Psychogeriatrics</i>             | Editorial material | Australia    | October 2020   | 22 |
| 42 | Frailty in the face of COVID-19                                                                                      | <i>Age and Ageing</i>                             | Editorial material | Australia    | July 2020      | 22 |
| 43 | Loneliness and social isolation during the COVID-19 pandemic                                                         | <i>International Psychogeriatrics</i>             | Editorial material | Taiwan       | October 2020   | 22 |
| 44 | COVID-19 and older people in Asia: Asian Working Group for Sarcopenia calls to actions                               | <i>Geriatrics &amp; Gerontology International</i> | Review             | Japan        | June 2020      | 22 |
| 45 | a unique presentation of delirium in a patient with otherwise asymptomatic COVID-19                                  | <i>Journal of the American Geriatrics Society</i> | Article            | Saudi Arabia | July 2020      | 22 |
| 46 | Frailty in the face of COVID-19                                                                                      | <i>Age and Ageing</i>                             | Editorial material | Australia    | June 2020      | 20 |
| 47 | Rationing limited healthcare resources in the COVID-19 era and beyond: ethical considerations regarding older adults | <i>Journal of the American Geriatrics Society</i> | Article            | USA          | June 2020      | 19 |
| 48 | Essential long-term care workers commonly hold second jobs and double- or triple-duty caregiving roles               | <i>Journal of the American Geriatrics Society</i> | Article            | USA          | August 2020    | 19 |
| 49 | Geriatric medicine in Italy in the time of Covid-19                                                                  | <i>Journal of Nutrition Health &amp; Aging</i>    | Editorial material | Italy        | May 2020       | 19 |
| 50 | COVID-19 infections and deaths among Connecticut nursing home residents: facility correlates                         | <i>Journal of the American Geriatrics Society</i> | Article            | USA          | September 2020 | 18 |
